# Supplementary material for: Identification of Downregulated Exosome-Associated Gene ENPP1 as a Novel Lipid Metabolism and Immune-Associated Biomarker for Hepatocellular Carcinoma
Source: Hindawi journal article supplement (doi:10.1155/2022/4834791), 2022-09-26
Supplement: f1 [file 4834791.f1.zip]

**Supplementary Table 4. The top 30 genes negatively linked with ENPP1 in LIHC**

|         |        |          |          |        |
|---------|--------|----------|----------|--------|
| TSPAN15 | MFSD10 | KIAA1522 | TMEM132A | SYT13  |
| AGRN    | ALOXE3 | SH2D3A   | RHOV     | ALDOA  |
| CTXN1   | ATP8A2 | CD58     | PDLIM7   | KRT80  |
| ITGB4   | ATP1A1 | SPINT1   | CEACAM7  | PRSS22 |
| FA2H    | EPN3   | SYNGR3   | SEL1L3   | TUBB3  |
| PFKP    | TEX19  | ANXA4    | TAX1BP3  | ANO9   |
