# Supplementary material for: Identification of Downregulated Exosome-Associated Gene ENPP1 as a Novel Lipid Metabolism and Immune-Associated Biomarker for Hepatocellular Carcinoma
Source: Hindawi journal article supplement (doi:10.1155/2022/4834791), 2022-09-26
Supplement: f1 [file 4834791.f1.zip]

**Supplementary Table 3. The top 30 genes positively linked with ENPP1 in LIHC**

|        |         |         |          |        |
|--------|---------|---------|----------|--------|
| EPM2A  | CFL2    | DMGDH   | CHN2     | CD302  |
| PEX3   | CDO1    | HBS1L   | BHMT2    | SEPP1  |
| ACOX2  | ZRANB1  | SLC47A1 | SH3BGRL2 | PLG    |
| NT5DC1 | SLC22A3 | HINT3   | SLC25A42 | SLC2A2 |
| SESN1  | THRB    | SLC38A4 | SARDH    | DEPDC7 |
| CPN2   | RHOBTB3 | ACADSB  | HSDL2    | TUBE1  |
