# Supplementary material for: Identification of Downregulated Exosome-Associated Gene ENPP1 as a Novel Lipid Metabolism and Immune-Associated Biomarker for Hepatocellular Carcinoma
Source: J Oncol. 2022 Sep 26;2022:4834791. doi: 10.1155/2022/4834791 (PMC9529392; doi:10.1155/2022/4834791)
Supplement: Supplementary Materials — Supplementary Figure 1. Identification of coupregulated molecules between the exosome-associated gene dataset and three GEO-LIHC datasets. Supplementary Figure 2. The relationship between ENPP1 and chemokines in TCGA-LIHC patients. (a) The heatmap indicated the association between ENPP1 and several chemokines and (b) the correlation analysis between several chemokines, CXCL1, CCL26, CXCL8, and CXCL3, and ENPP1 expression. Supplementary Figure 3. The relationship between ENPP1 and chemokine receptors in TCGA-LIHC patients. (a) The heatmap indicated the association between ENPP1 and several chemokine receptors and (b) the correlation analysis between several chemokine receptors, CCR5, CCR10, CXCR3, and CXCR4, and ENPP1 expression. Supplementary Table 1. The exosome-associated gene dataset. Supplementary Table 2. The DEGs between LIHC and normal liver tissue were analyzed from three GEO datasets, GSE6764, GSE14323, and GSE14520. Supplementary Table 3. The top 30 genes were positively linked with ENPP1 in LIHC. Supplementary Table 4. The top 30 genes were negatively linked with ENPP1 in LIHC. [file 4834791.f1.zip › Supplementary Table 1.txt]

ID
CDC42
CP
CD47
EEF1A1
EPCAM
ERBB2
FGFR2
CHEK2
BARD1
TSC2
CASP7
SFN
TYR
CCKBR
CYP11A1
GATA4
ABCB11
IVL
BID
SDHA
USF1
RHO
TAC1
HLA-DQA1
RIPK1
CUL4A
ABCB5
ADCYAP1
FZD5
RANBP1
CASC3
GPBAR1
PSMC5
POLR2K
PLCB4
DOK1
SF3B4
GTF2I
NOC2L
MEF2A
CYC1
MRPL21
MRPL4
BDKRB2
PIK3R5
PRPF3
PSMD2
SNRPA1
RPS10
ADRA1B
TRIOBP
RPL26L1
FAM162A
SF3A2
HER2
CD82
CD24
Del-1
Dicer
POSTN
FGFR3
FIBP
FRS2
FTH1
FTL
GSTP1
HOXC6
HTR7
IGF1R
IL1RAP
ITGB1
KISS1R
KRT14
LDHA
MTDH
NANOG
NEUROD1
Plau
RAB13
RPL28
S1PR2
TGFBR1
TRPC5
TSG101
UCHL1
ADAM10
CYP19A1
CTSB
ELK1
PIGR
FGF9
DUSP1
MRPS30
DMRT1
CXCL13
BLZF1
ANAPC1
ALDH9A1
ENPP1
CDC23
ARF6
HDC
CSTB
POU4F1
TLR5
ABCC9
RBM10
DTX3L
ADH1A
HEXA
MRPL15
ITGB7
DCT
HRNR
CACNB2
AP2S1
DOK7
PKN2
TPP2
ABCB1
BIRC5
