# Supplementary material for: Identification of Downregulated Exosome-Associated Gene ENPP1 as a Novel Lipid Metabolism and Immune-Associated Biomarker for Hepatocellular Carcinoma
Source: J Oncol. 2022 Sep 26;2022:4834791. doi: 10.1155/2022/4834791 (PMC9529392; doi:10.1155/2022/4834791)
Supplement: Supplementary Materials — Supplementary Figure 1. Identification of coupregulated molecules between the exosome-associated gene dataset and three GEO-LIHC datasets. Supplementary Figure 2. The relationship between ENPP1 and chemokines in TCGA-LIHC patients. (a) The heatmap indicated the association between ENPP1 and several chemokines and (b) the correlation analysis between several chemokines, CXCL1, CCL26, CXCL8, and CXCL3, and ENPP1 expression. Supplementary Figure 3. The relationship between ENPP1 and chemokine receptors in TCGA-LIHC patients. (a) The heatmap indicated the association between ENPP1 and several chemokine receptors and (b) the correlation analysis between several chemokine receptors, CCR5, CCR10, CXCR3, and CXCR4, and ENPP1 expression. Supplementary Table 1. The exosome-associated gene dataset. Supplementary Table 2. The DEGs between LIHC and normal liver tissue were analyzed from three GEO datasets, GSE6764, GSE14323, and GSE14520. Supplementary Table 3. The top 30 genes were positively linked with ENPP1 in LIHC. Supplementary Table 4. The top 30 genes were negatively linked with ENPP1 in LIHC. [file 4834791.f1.zip › Supplementary Table 2.txt]

GSE6764-down		GSE6764-up		GSE14323-dowm		GSE14323-up		GSE14520-down		GSE14520-up
ANGPTL6		CAP2		AMIGO3///GMPPB		HLA-DRA		CLEC4M		SF3B4
DACH1		UBD///GABBR1		STARD5		HLA-DPA1		MARCO		LOC101927137///CCT3
PZP		LOC101930591///FAM21A///FAM21C		GYG2		LGALS3		CYP1A2		PRCC
CLEC4M		TARBP1		MMACHC		LOC101060835///LOC100996809///HLA-DRB5///HLA-DRB4///HLA-DRB1///HLA-DQB1		CLEC1B		ARID4B///RBM34
GNAO1		PLVAP		DHODH		LUM		FCN3		POGK
KCNN2		ITGA6		IDH2		LOC101060835///LOC100996809///HLA-DRB4///HLA-DRB3///HLA-DRB1///HLA-DQB1		ESR1		GNPAT
DBH		FAT1		INTS5		CD74		VIPR1		DDX39A
CLEC4G		TRAF5		NACC2		LOC100996809///HLA-DRB4///HLA-DRB1		CXCL14		SPTAN1
MAP2K1		DNAJC6		SLITRK3		UBD///GABBR1		CRHBP		ASPM
FCN2		PARP12		IGFLR1		LYZ		CD5L		UBAP2L
RHEB		SNORD77///SNORD76///SNORD74///GAS5///SNORD44///SNORD47///SNORD80///SNORD79///SNORD81		TRAM2		HLA-DRB1		STAB2		CNIH4
ADRA1A		TMEM267		ST3GAL6		RNASET2		PTH1R		MEA1
COLEC10		TRIM11		IFNAR1		HLA-DMA		CFP		MRPL9
BMPER		IDI1		KCNN2		HLA-DPB1		DNASE1L3		TP53BP2
DEFA1B///DEFA3///DEFA1		AAK1		AQP3		VIM		LCAT		TROVE2
CNDP1		MALAT1		TBC1D8B		EFEMP1		NAT2		SMC4
ARHGAP10		XPO1		SEC24D		IGFBP7		PLAC8		HSPB1
ACACB		SPATS2		GOLIM4		LOC101060835///HLA-DQB1		FCN2		SCAMP3
KRTCAP3		DNM1L		RWDD2B		DKK3		TBXA2R		KIAA0101
KBTBD11		HMMR		LINC00963		COL4A1		CYP2B6		RACGAP1
LINC01093		ASPM		SDF2L1		LOC100509457///HLA-DQA2///HLA-DQA1		EGR1		PIGC
CYP1A2		DUXAP10		PTPN3		SH3BGRL		ECM1		INTS8
ANKRD55		RRM2		SEC61A1		IFI27		GSTZ1		TBCE
LYVE1		COL15A1		KDM4B		PECAM1		FCGR2B		RBM42
PITPNM3		OSBPL3		ALPL		GPNMB		CETP		GMNN
KAZN		FLVCR1		PRPS1		CD52		ACADS		VPS45
IGFALS		TCHP		EXPH5		IFI16		MT1F		VPS72
VIPR1		TTC13		SLC33A1		COL1A2		HAMP		PEA15
STAB2		LOC101930591///FAM21C		FNDC4		CASP1		CYP2C9		ZWINT
FOS		EZH2		NCOR1		COL4A2		MT1M		CLTA
MT1F		B3GALNT2		SALL1		FRZB		PAMR1		DYNLRB1
CCL23		KIAA0907		YARS		ASPN		IGFALS		TOP2A
CFP		ZFP62		RSL1D1		PLVAP		IGF1		KIAA0907
SRD5A2		AKR1B10		OR7E37P		HLA-B		MT1X		COG2
CYP2C19		RACGAP1		MFSD9		MGP		MT1E		KPNA2
EGR3		ABL2		EDEM1		ITGBL1		GLYAT		SUCO
LIFR		CCT6A		MAN1A2		TMSB10		LPA		ACLY
PTH1R		GM2A		ATF5		TPM1		CYP1A1		DNAJC9
ATF5		UBE2A		PC		HLA-DQB1		ST3GAL6		NUSAP1
RNF165		CKAP2		CCDC69		FABP5		GCDH		RFXANK
OIT3		SMG7		MFAP3L		PTPRC		EXPH5		SNRPB
NCOR1		MDK		NANS		MARCKS		ETFDH		TPR
ASPG		ERMP1		DLEU1		CXCL10		ADRA1A		H2AFX
SARDH		PTTG1		SHMT2		SPARCL1		MFAP3L		SAC3D1
DIRAS3		UBQLN4		SLC44A1		TRIM22		ACSM3		LRRC1
SPOCK3		COL4A1		DNAJC3		CXCL9		TAT		DLG5
LOC102725343		8-Sep		DNAJC12		CPVL		CYP3A4		MIR1236///NELFE
ECM1		LOC101927137///CCT3		LPA		RGS10		SLC22A1		CCT6A
SLC31A1		ROBO1		PAIP2B		TYROBP		KBTBD11		PFDN4
ERICH1		UBAP2L		THADA		S100A10		FOS		DNMT1
AADAT		BUB3		HYOU1		RFX5		GCKR		H2AFY
LPA		RFX5		MTRR		TRAC		DBH		PSMD4
CLEC1B		AURKA		AR		COL1A1		MT1G		CTNNA1
FITM1		TCERG1		KIAA0100		C6orf48		IL1RAP		CKAP4
KDM8		AGPAT1		PGM3		LBH		RCAN1		LMNA
AOC1		CAMSAP2		MASP2		HLA-DMB		F11		OLA1
PHLDB2		RASSF4		CTBS		CALD1		IER2		MIR3658///UCK2
CYP2B6		RAP2A		ADRA1A		PLA2G4C		MT1HL1		TTC13
IL1B		HSPA4		SEC23B		DEFB1		RCL1		TARBP1
GNA14		GMPS		GSPT2		ENPP2		ECHDC2		UBE2Q1
RCAN1		CHD7		FICD		ANXA1		RDH16		RRM2
THBS1		GPC3		HSP90B1		AKR1B10		GYS2		PTTG1
EGR2		THOC2		PRG4		PNN		GPM6A		DAP3
MOGAT2		ALMS1		ETNK1		ANXA2		SRD5A2		TACC3
ADGRG7		PSMG3		KLHL2		HLA-F		KCND3		RABIF
ALPL		CCDC93		RABAC1		TRBC1		GLS2		AURKA
SLC25A37		HMGN4		DESI1		TSPAN8		FXN		NUP37
FAM151A		COG2		ARNTL		CXCR4		KMO		MYL6B
PTGS2		MAP2		SLC17A2		S100A11		CDC14B		CENPF
MT1G		ATR		NRBF2		ABCC4		HAO2		ENAH
PLPP3		MRPS21		MCFD2		SOX4		ITIH4		PPP4R1
IL1RAP		VWF		GCHFR		KRT23		ADH1B		PRC1
CTNNA3		ADAR		SLC16A7		CTSS		PROZ		SPATS2
LHX2		TP53BP2		GFPT1		AQP1		MT2A		HGS
TIMD4		MPZL1		PPP1R1A		CRIP1		RBP4		NEU1
ITLN1		ZNF746		NDUFC2-KCTD14///KCTD14		RNASE6		MLYCD		GTF2IP4///GTF2IP1///GTF2I
MT1M		CCAR1		SCLY		PTGDS		CBR4		DUSP12
FCN3		LUC7L3		GALNT2		PODXL		BCKDHB		CDK1
FAM65C		KIF14		TPST1		STAT1		CPEB3		EHMT2
DPF3		UXS1		DTX4		ITM2A		PLPP3		TMEM147
LGI1		CCNB1		ACACB		IFIT1		GRHPR		SNRPE
SLCO4C1		SLC39A10		ENPP1		RNASE1		MT1H		LOC101930591///FAM21A///FAM21C
FAM134B		ABCC5		TRIB3		COL3A1		MAN1C1		HEATR1
ADGRA3		CCNA2		SRPRB		TPM2		SLC25A37		LOC101927733///HMGN1
CXCL14		DYNC1H1		PZP		RGCC		EIF5		CCL20
CSRNP1		ABCC10		SEC16A		JAG1		ASS1		SNRPD2
ADAMTS13		TPR		ADGRA3		S100A6		ALDOB		ITGA6
LCAT		TOP2A		RAB33B		IGK///IGKC		EHD3		SMARCA4
IL13RA2		SMARCA4		IMPA2		SOX9		FAHD2A		UBE2C
SFRP1		NECAB3		PID1		BLVRA		MASP2		TUBA1B
NTF3		DTNA		MAOA		HLA-DRB6		CTH		DTL
LPAL2		MTR		PLA2G16		LGALS4		FYN		MCM6
MCC		PRKAB1		WWC2///CLDN22		EPHA3		N4BP2L1		NDC80
MARCO		SLC26A2		NECTIN3		ANXA4		KDM8		SLC26A2
NAT2		ZNF207		PDIA4		LOC101926921///DAB2		SRPX		CPSF6
ACADS		RP9		CRELD2		PLXNC1		APOF		PRRC2A
TFPI2		CPSF6		SLC43A3		MXRA7		CYP2B7P///CYP2B6		GPC3
TPPP2		ZWINT		FZD5		LPAR6		CDC37L1		SNRPD1
CRHBP		DNAJC2		CPN1		MMP7		KLKB1		CCNB2
DNAJC25-GNG10///DNAJC25		CENPF		BCR		CCL5		GNE		SUZ12
PROSC		PRRC2C		ATG2B		SERPINE2		MTHFD1		BUB1B
ADH4		KIAA0101		SMPD1		APOL3		HBB		HNRNPUL1
DNASE1L3		SLC9A6		SLC2A10		SEL1L3		ALDH6A1		NPM1
SPRYD4		RNF213		NRTN		ISG15		ADH6		METTL5
FAM198A		PEAK1		SLC11A2		PPT1		ADGRA3		FLAD1
AHNAK		SLC38A6		SERPINA10		SPP1		AASS		HJURP
NR4A3		UBR5		NADK		IGLV1-44		MSRA		TUG1
SPRY2		VPS13B		H6PD		ALDH1A1		CXCL12		HMGA1
ARMC6		GGPS1		PAPSS2		EVI2A		ZC3H13		MPZL1
LILRA2		TROVE2		ZCCHC14		CYAT1///IGLV1-44///IGLC1		SLC27A5		RAD21
SHMT1		RCC2		PRRG4		LGALS1		SLC35D1		SMG5
IFNAR1		ASH1L		SLC39A14		CD2		MRC1		LAMC1
PLSCR4		SNHG1///SNORD22///SNORD25///SNORD26///SNORD27///SNORD28///SNORD30///SNORD31///SNORD29		PEG3		SWAP70		TIAM1		GBAP1
GSTZ1		HARS2		ZCCHC24		GEM		PLGLB1///PLGLB2		ITGB1BP1
HHIP		CDKN3		C4orf19		DCN		PEMT		GINS1
C1RL		HTATIP2		INTS6		IGKC		CYP39A1		UBE2S
IER2		FAM219B		SERP1		BTN3A2		KLHL2		LBR
IL17RC		ARID4B///RBM34		DENND4A		GUSBP11		ZCCHC24		MELK
EGR1		RCN2		ATP2A2		DDX60		HGFAC		STIP1
SLC7A2		THY1		PTPRF		LAPTM5		LOC100507577///LONP2///SIAH1		PABPC1
TMEM27		TDRD7		RAB27A		AEBP1		GNMT		CAP2
MASP1		FAM72A///FAM72D///FAM72B///FAM72C		PROX1		SPARC		LYVE1		YWHAZ
MAN1C1		STX6		SLC25A16		CXCL8		C1R		LASP1
TSLP		USP21		NPAS2		CD53		SAT1		ECT2
LNP1		PIGC		BLNK		NAP1L1		C8A		SSR2
ACSM3		LOC101930489///MIR4435-2HG///LINC00152		MLEC		MIR8071-2///MIR8071-1///IGHV4-31///IGHM///IGHG2///IGHG1		STEAP3		LARP1
CYP39A1		PABPC1		SLCO4C1		ARHGDIB		SKAP1		FEN1
ACPT		DTL		NUCB2		FABP4		PDE2A		TRIM28
ENPP1		KPNA2		DPAGT1		ITGA4		STARD5		NUP62
PIGV		LENG8		MAP2K1		IGLC1		BLOC1S1-RDH5///RDH5		HMMR
BBOX1		CDKN2A		GNE		TNFAIP8		CTBS		HN1
ACAA1		E2F3		PDIA3		CCL19		CYP2E1		SAE1
DIP2C		FAM169A		ALB		TPM4		GOT2		SETDB1
RSPO3		ACLY		TTPAL		SLAMF8		CYP2C19		CKAP2
LOC102724449		STMN1		MCL1		TXNIP		CD1D		PRRC2C
NDRG2		HLA-A		MANF		SLC1A3		ASPA		MCM5
MT1H		PSMD4		HPS5		LIPA		GPD1		PRKD2
MT1E		ZNF544		FCN2		DCK		HIBCH		ARID4B
AIG1		AKR1C3		MANEA		SLC17A4		VSIG4		TUFT1
MEP1B		VPS45		ITIH4		CCL21		CD163		CACYBP
TTPAL		ENAH		S100A12		LDHB		ZGPAT		EPRS
PGM1		SNORA16A///SNORA61///SNORA44///SNHG12		RAB14		GJA1		SARDH		YWHAB
ASPA		SETDB1		IL1RAP		DPT		CYP4A11		RFX5
CETP		FAM50A		METAP2		CD44		SORL1		UBAP2
NR4A1		GDI1		SLC1A4		LOXL1		ACACB		LOC100506248///MIR1244-2///MIR1244-3///MIR1244-1///LOC728026///PTMA
EDNRB		RALGAPB		NPC1L1		MLIP		ACAA1		UFC1
TUBE1		UTP14A		SEL1L		CTGF		C1RL		PLVAP
PAMR1		RASAL2		KCND3		RGS5		ZG16		TYMS
C8orf4		CDK1		SDF4		ARL4C		ABAT		CAMSAP2
FOSB		CTSA		KCNB1		PDGFD		HADH		TMEM189-UBE2V1///TMEM189///UBE2V2///UBE2V1
FAHD2A		PDE7A		XPOT		TIMP3		ADK		CDKN3
NPY1R		OTUD6B		KLHDC10		IGLL3P		IGFBP3		TPGS2
C21orf33		SORT1		SNORA29///TCP1		FCGR2A		ACSM5		LOC101930591///FAM21C
SLC19A3		CD34		GAREM1		IFI44		CYP2A7		CHD1L
SERPINE1		TBCE		MOCOS		FBLN5		CCL15-CCL14///CCL14		IPO9
JUN		GNPAT		ABLIM3		TGFBI		MME		MCM3
TTC36		POGK		PRKAA1		MMP2		CYP3A43		RNF34
TLR4		CDKN2B		SEL1L2///GPR37		TNFRSF21		NDRG2		EZH2
ESR1		ZBTB37		TBL1X		IGLJ3		ALDH2		HAUS3
INHBC		NDC80		MYRIP		CECR1		CDA		NPC1
PCDH9		LNPEP		SERPINF2		FGL2		GPT		CCNB1
GPD1		ZNF623		DIEXF		IGKV1OR2-108		PIGV		PRKDC
ID2		PUS7		NUCB1		IQGAP1		SLC6A13		POLD1
SLC35D1		NUP133		MT1M		TBC1D9		ECHS1		U2SURP
THRSP		TIGD1		STAT3		SNAI2		LPAL2		BOLA2B///BOLA2
PBLD		TTL		SLC5A6		LHFP		CPB2		ISG20L2
CCL15-CCL14///CCL14		ASXL2		ASGR1		YWHAZ		NR1I2		DDX41
ABCC9		GMNN		NMT2		VCAN		HAAO		CNOT6
MIR6778///SHMT1		APOBEC3B		ASB13		GSTA1		NR3C2		MDK
MT1X		RPL17-C18orf32///SNORD58C///SNORD58A///SNORD58B///RPL17		DNAJB9		CTSC		HSD11B1		HSP90AB1
SC5D		STC1		KRT10		CD48		ZFP36		SULT1C2
ABAT		ZNF260		LOC101928916///NNMT		GLIPR1		SEC14L2		MCM7
ACADSB		DSTYK		SLC22A3		IGLJ3///CKAP2		GHR		GLS
PSD4		MIR6824///SLC26A6		RFC5		LXN		RHOB		RPL8
EPOR		PRKD2		LBP		AKR1B1		SLC46A3		TMF1
CIDEB		CEP68		AGL		PTGER4		MS4A6A		DYNC1H1
NMRK1		LEF1		TJP2		GZMK		SIRT5		MORC2
PXDC1		SRXN1		ABAT		ACTA2		ZGPAT///LIME1		MCM2
GPM6A		HSPH1		ABCA1		TM4SF4		DCN		FABP5
SLC25A47		CYTH2		SPEN		HMGB2		CYP4A22///CYP4A11		NAP1L1
EHD3		CENPU		SAA2-SAA4///SAA2///SAA1		MX1		DPT		STMN1
STEAP3		RLIM///PABPC1		CRP		GZMA		BDH2		CBX1
MRO		TMEM106C		UFL1		SRGN		LOC100507577///LONP2		RPRD2
SLC28A1		THEM4		LOC100507472///PCSK6		APOBEC3G		CD14		LYRM4
IGFBP3		ZNF398		MAGT1		VWF		SCP2		CPD
LILRB5		GTF2H2B		FCN3		CMAHP		PAIP2B		TUBG1
PPBP		NOP2		C1RL		SPINT2		SUCLG2		RRP15
LARP1B		MIR612///NEAT1		HSPA13		HSPB8		OLFML3		RFC4
CNTLN		NDRG3		ZNF652		LGALS3BP		GBA3		KIF14
ST6GAL2		VAMP1		ARMCX3		LAMA2		ID1		C6orf48
CD4		NBR1		STEAP3		PLAT		PQLC1		CENPU
SLC3A1		SLC7A6		MT1F		EVI2B		IVD		LAPTM4B
NCKAP5		LOC100506639///ZNF131		ITGA1		GMNN		HLF		TUBA1C
ALDOB		PPOX		PTP4A2		COL15A1		PON1		ACTR2
PNPLA4		SRPK1		AKAP9		KCTD12		C6		CASC7///AGO2
TENM1		RHNO1		S100A8		THBS2		SLC23A2		CLIC1
PEMT		MID1		SDHAF3		ARHGEF3		AOX1		NEMP1
JUNB		PBXIP1		PLGLB1///PLGLB2		IGKV1OR2-118		DCXR		RCN2
MSRA		COA6		ANPEP		IFI44L		GCH1		SCRIB
EPHX2		PODXL		CLEC4M		ROBO1		HBA2///HBA1		CCT5
CYP26A1		TRMT6		ABCA5		FBN1		ACADSB		HSPA4
GNE		LAMC1		GUSBP9///GUSBP3		FGFR2		SLCO1B3		VEZF1
DCAF11		PRC1		GCH1		PLA2G7		FBP1		ACSL4
NHSL1		SLC22A5		SREBF1		ZNF83		NPY1R		NEK2
LOC100996579		NEK2		MT1G		PDLIM3		CYP26A1		CSE1L
MFSD2A		MIR1204///PVT1		LACTB2		TUBA1A		C9		PLXNA1
DGAT2		C9orf16		SRSF11		JCHAIN		IRF8		UTP18
CNTN3		MICB		SORBS1		GSN		ACADL		BARD1
DDAH1		ECT2		APOF		COL6A3		CYP2A6		CTSA
STEAP4		LARS		MBNL3		LOC101928361///ARHGAP15		SRD5A1		SNRPA
FREM2		PABPC3		SYNE2		HBB		CA5A		POLR3C
DBT		ATAD2		ADK		MFAP4		CSAD		PSME3
ZADH2		HELLS		EFHD1		TM4SF1		GABARAPL3///GABARAPL1		KIF4A
FERMT2		CD200		IL6ST		RAPGEF5		MGMT		UBA2
MT1HL1		TBC1D31		EIF2AK3		IGHM		GABARAPL1		TOPBP1
APOF		CNOT6		LRIF1		CDH11		FOLH1B		NOL7
MAGI2-AS3		IQGAP3		SAA2-SAA4///SAA4		OTC		DCAF11		TPX2
INTS10		PPP4R1		NAMPT		MYOF		NMRK1		CD24
HSD17B14		UPF3B		GREM2		STMN2		HMGCL		IDUA
KLF6		ARID4B		KRAS		NREP		ACAT1		TPRKB
ENO3		RPS6KC1		SAA2///SAA1		UCP2		KAZN		WSB2
ZFP36		DONSON		ABHD2		CAPG		MAT1A		THOC2
HAO2		DCLRE1C		NAT2		BMS1P20		FAM13A		BIRC5
CRAT		SNORA72		MT1H		PSMB9		ETNPPL		AGFG1
ETFDH		CENPW		IL1RN		TCEA2		SMARCA2		FAM222B
ALDH6A1		THUMPD3-AS1		ADGRG6		FAS		ACAA2		COL4A1
CYR61		BUB1B		LIPG		MDK		LYRM1		PAFAH1B3
CTBS		IFI27		IGF1		EPCAM		SLC25A20		ILF2
SORL1		KRT23		ELOVL6		NAT8B///NAT8		PBLD		H2AFV
TCTEX1D1		ALB		CYP2C18		BICC1		AR		MYO5C
PID1		MIR15A///DLEU2L///DLEU2		MT1X		RTP4		FOSB		NME1-NME2///NME2
IL33		AP3M2		HAMP		HLA-DQA1		CLU		DESI2
PEX11G		SMYD3		RAB29		PTGER3		AKR1D1		MIR6849///MIR1234///MIR939///CPSF1
CLN8		NCAPG		RPL38		DPYSL2		EPB41L4B		EIF3H
S100A12		IGF2BP2		CPEB3		ID4		MIR6883///PER1		H2AFZ
DUSP1		CRNDE		SLC1A1		FAP		KCNN2		MARK4
MEIS3P1		ELOVL2		C6		BEX3		MACROD1		KIF20A
AQP3		ZNF862		CYP2C19		IL7R		OAT		CHD7
MFAP3L		MFSD6		HAO2		TYMS		SYNE1		SMYD3
PROS1		ANKRD27		C9		ACSL4		C8B		HLTF
FAM149A		STAU2		CXCL2		VAMP3		MUT		UPF3B
ARHGEF26		AHCTF1		TMEM97		IGLJ3///IGLV1-44///CKAP2///IGLV@///IGLC1		ACBD4		MFF
CPED1		XPR1		TSPAN13		PMP22		AZGP1P1///AZGP1		UBE2E1
CLRN3		PDCD5		WASL		CYP3A7-CYP3A51P///CYP3A7		ANXA10		ZNF544
TRIB1		TIPRL		DICER1		HBA2///HBA1		TTPAL		ROBO1
MTHFD2L		FAM83D		LDLR		CCL15-CCL14///CCL15		FANCC		TMPO
PRKAG2		PRCC		SPINK1		CD69		XDH		DYNLL1
SFRP5		SAC3D1		MME		UGT1A3///UGT1A1///UGT1A9///UGT1A5///UGT1A8		SLC6A12		TMEM106C
MT2A		PDCD2		INHBE		IGHV3-23///IGHV4-31///IGHM///IGHG1///IGHA1		CROCCP2		MAPRE1
KLF11		STK39		SLCO1B3		LCP2		IGHM		KNTC1
PTPRB		SOS1		STEAP1		FCGR3B///FCGR3A		ACSM2B///ACSM2A		RUSC1
FOLH1B		MGEA5		PPP1R3C		WIPF1		SERPING1		USP3
LILRA5		CSPP1		NFIL3		IGHV4-31///IGHM///IGHG3///IGHG2///IGHG1///IGHD///IGHA2///IGHA1///IGH		C7		NUP133
CYP2C8		RNF44		ALDH6A1		TCF4		TMEM47		GCN1
LOC101927972		MIR452///MIR224///GABRE		HPGD		ELOVL2		APOC4-APOC2///APOC4///APOC2		GORASP2
GCHFR		PLCG1		DHRS2		CELF2		ENPEP		ACBD3
BCO2		PRR11		CFHR5		ENAH		CTSO		MCM4
LOC105378749		TEFM		GPR88		CYTIP		DHRS1		LPGAT1
FOLH1B///FOLH1		ZIC2				IGHV3-23///IGHV4-31///IGHM///IGHG4///IGHG3///IGHG1///IGHD///IGHA2///IGHA1///IGH		LOC102724562///MST1L///MST1P2///MST1		PNMA1
HGF		NEDD4L				IGHD		MPC1		C8orf33
BCKDHB		BIRC5				CTSK		CFI		SUB1
CAT		TXNRD1				IL32		FTCD		SF3A2
MUM1L1		CCNE2				IGLJ3///IGLV@///IGLC1		SLC6A16		PTPN12
AGL		LRRC1				COL5A2		DHRS4L2///DHRS4		FDPS
HBA2///HBA1		GBAP1				FETUB		PALM2-AKAP2///AKAP2		EPS8L3
AGXT2		SAE1				FILIP1L		FOLH1B///FOLH1		STIL
RXRA		LINC01296///DUXAP10				TNFSF10		MST1		KIF18B
JAKMIP2		HAUS3				OASL		RND3		PLXNC1
PRRG4		YWHAZ				LECT2		ALAD		FOXM1
IYD		FOXP1				FAM129A		HPD		AGRN
GBA3		ENTPD1				FN1		ALAS1		LOC400927-CSNK1E///CSNK1E
TMEM53		LOXL2				GPR183		C8orf4		PKN1
PXMP2		COG5				CLDN10		PIK3R1		ANP32E
CLU		CCDC18-AS1				DPP4		AGL		NCAPG
GATA4		LARP1				IGHV4-31///IGHM///IGHG3///IGHG1///IGHD///IGHA1		F8		NSUN5
CPEB3		CEP350				CD46		RBL2		YIPF3
NR1H4		AMMECR1				MYL9		FAM134B		CDK4
GHR		DUSP12				OAS1		ACSL1		CDC20
BCHE		RBP7				TAGLN		MIR22///MIR22HG		PKM
ATP11C		SUCO				ZFAND5		HAGH		RALA
F11		MAGED2				C1QB		CYP2C8		ALDOA
FLJ22763		ACSL4				CXCL6		SLC28A1		PLCB1
BDH2		DLGAP5				CPE		CYP3A5		MAPK9
ADAMTS1		MAD2L1				FMO5		2-Mar		NUP205
TBX15		CKS2				EMP1		PLSCR4		CSTB
SLC39A14		CRIPT				NPL		ZNF330		CALM3///CALM2///CALM1
PDE4DIP		ZNF318				C10orf10		DHODH		HS2ST1
GPR182		TRIM52				FCER1A		CDHR2		SLBP
COMT		PRKAA2				IFIT3		TRIM22		SMARCC1
AZGP1P1///AZGP1		LINC01296///DUXAP10///DUXAP8				LOC101060835///LOC100996809///HLA-DRB6///HLA-DRB5///HLA-DRB4///HLA-DRB3///HLA-DRB1///HLA-DQB1		NAT1		PRUNE1
TCF21		MED20				RGS1		KLF9		PRIM1
GCGR		DESI2				RAB31		GADD45A		VARS
ABHD6		TNPO1				FZD7		JCHAIN		CKS2
MOCOS		RUSC1				LOC102725526///IGHV4-31///IGHM///IGHG3///IGHG2///IGHG1///IGHA2///IGHA1///IGH		PDLIM5		PCNA
TSPYL5		GALNT10				RSAD2		PFKFB1		SQLE
HAAO		SNHG17				GLS		NR4A1		CDC7
ST20-MTHFS///MTHFS		MELK				ITK		LOC101928916///NNMT		TTK
C8A		PABPN1				MTHFD2		CXCL2		NUP107
IL20RB		CASC7///AGO2				F3		MIR6778///SHMT1		MIR6756///MCAM
DCUN1D3		RBM15				TACSTD2		SLC17A2		UBD///GABBR1
PKD2		GINS1				TUSC3		HAO1		PARP1
GSPT2		KIAA1462				GPC3		ADH1C		DLGAP5
PRKAR2B		RAD21				IGHA2///IGHA1///IGH		GCGR		CSNK1D
PHYHD1		CDKN2C				IGHV3-23///IGHV4-31///IGHM///IGHG3///IGHG1///IGHA2///IGHA1		OGDHL		ANKRD27
WDR72		ATP6V1C1				OAS2		SLCO2B1		GBAP1///GBA
PPFIBP1		KNTC1				LEPROT///LEPR		KCNMA1		ADNP
FPR1		NAA25				ATP1B3		AFM		PSMD14
LINC01018		BTN2A1				MYH4		SLC31A2		MIR1292///SNORD110///SNORD86///SNORD57///NOP56
TSPAN12		PLEKHA8				SLC10A1		LHPP		TPM2
APOA5		DDX39A				CYP1B1		SPP2		SMARCB1
NR3C2		ABCF2				CYP3A7-CYP3A51P		DUSP1		WHSC1
ALDH2		GLA				IFI6		ECM2		RBM12
ZGPAT		TMEM68				IGLL5		CFHR4		THY1
SELE		FAIM				PDK4		SIGIRR		MAD2L1
SLC25A20		ZNF605				MS4A4A		QDPR		PSPH
NAAA		RRP15				CD24		MST1L		COPE
PPP1R1A		ZBTB41				LY96		HGD		TBCB
VNN1		ANO10				BIRC3		SULT1A2		HMGN4
CYP4F12		TYMS				C7		GRAMD1C		CAPG
NTN4		MLH3				RARRES1		TRIM66		SYNJ2
GPRC5C		CTC-338M12.4				LOC100509457///HLA-DQA1		PON3		GTPBP2
CXCL2		HSPB1				GPR171		SOCS2		C1orf106
UGP2		SLC38A1				COL14A1		ANG		ANXA2
NAT1		HEY1				CXCL11		FXYD1		TRAF5
CCBE1		ILF3				SPP2		C1S		AMMECR1
MPC1		DUT				ADAMDEC1		DNAJC12		CNOT3
MAN1A1		KRTCAP2				SH3YL1		JUNB		CKS1B
LOC647115		RBM12B				CCL20		BHMT		BTG3
SLCO2B1		IFT81				F13A1		GGT5		THOC5
RND3		WHSC1				THBS1		ABHD6		RNF187
NR1I2		SMURF2				SLC38A6		HPX		PSMC4
CBR4		LOC642846///DDX12P///DDX11				GAS1		SLCO1B1		CNPY2
ANKS4B		GPATCH4				GLUL		CYR61		TMSB10
C1QTNF1		SMYD2				KCNJ16		NR1I3		SPINK1
SPG20		HKDC1				SULF1		PCTP		TAGLN2
CYP4V2		CCDC34				SAMSN1		MBL2		RNASEH2A
LOC101927331		RFC4				POSTN		ABCA8		MKI67
DHODH		HNRNPU				GAGE12D///GAGE8///GAGE12F///GAGE2A///GAGE12H///GAGE12E///GAGE12B///GAGE12C///GAGE2D///GAGE12J///GAGE12G///GAGE13///GAGE2B///GAGE2E///GAGE12I///GAGE7///GAGE6///GAGE5///GAGE4///GAGE3///GAGE2C///GAGE1		COBLL1		UCKL1
GADD45B		MIR6800///MED25				ANK3		CISH		PEG10
SLC38A4		AGRN				RGS2		KHK		NARF
KALRN		NMRAL1P1				PDGFRA		ABCG2		CDK7
SLC9B2		MCM6				CYP3A4		EPHX2		BUB1
EPB41L4B		GLS				TSC22D3		ZCCHC6		HMGB2
ADAMTSL3		PRUNE1						EHHADH		AKR1C3
SLC41A2		SATB2						ERLIN1		NECAB3
PDLIM5		DLEU2						MYRIP		HMGXB4
AVPR1A		ARMC1						SULT1A1		KIF2C
FANCC		RPP40						KIAA0922		SHC1
KHK		S100PBP						CYB5A		IER5
PAPSS2		PRKDC						RNASE4		VPS13B
ARHGAP20		SESTD1						PROS1		GRN
ZNF385B		SNRPE						RIDA		ZNF706
LOC101928505		CEP83						COMT		WDYHV1
NFIA		ANLN						EXOSC7///CLEC3B		STK17A
PAIP2B		NPC1						F9		ASAP1
PTPRD		VRK1						GADD45G		PUF60
ZG16		ZBTB33						SAA2-SAA4///SAA4		DVL3
ACSL1		MSH5-SAPCD1///SAPCD1///MSH5						ADH1A		GTSE1
HMGCL		KIF20A						FERMT2		SOX4
ITIH1		FAM83H						PXMP2		SLC35F6///CENPA
RDH16		GOLPH3L						HPR		DCK
ADCY1		UBE2T						RGN		FAM50A
PTMS		LIG3						DHTKD1		SMYD2
CA2		NAP1L1						TTC38		MID1IP1
ID2B///ID2		UBE2C						AQP9		NEDD4L
DHRS4-AS1		DNAJB6						SLC10A1		TTLL4
P2RY13		ZNF767P						TDO2		RAN
HIBCH		BOLA2B///BOLA2						EGR2		BMP2
LY6E		COX20						CYP2C18		MMP11
PHGDH		PGP						SERPINA4		MIR6734///ELOVL1
ADK		MYBL1						KCNJ8		P2RX4
ZGPAT///LIME1		BCAT1						CUX2		ZYX
TM6SF2		NIPBL						PCK2		CAPN2
CDA		MIR7112///BOP1						FAM149A		GLA
LOC101926960		PUS1						LOC100996792///MAP2K3		TUBB4B
FEZ1		C1orf198						SLC38A4		TUBB
ANXA10		CTHRC1						ETS2		TPM1
RWDD2B		ITGB3BP						FNDC4		DBF4
ACTR3C		RNASEH2A						ASL		NDRG1
VKORC1		CACYBP						CAT		RPS21
GNMT		NPM1						CYP4F12		YWHAH
CXCL12		ANKRD29						TXNIP		PTK2
XDH		NIPAL2						CRYL1		MAP4K4
ITCH		SMC4						PCOLCE		AK6///TAF9
FAM13A		SAP30L						TENM1		PARP12
SLC17A2		BCCIP						SLC16A2		NUDT3
TPMT		ASAP1						ALDH8A1		GBP2
C1orf168		CS						ACADM		KIAA0196
FOXP2		LOC107985971						CIDEB		TUBB3
PLA2G16		NUSAP1						SLC1A2		POLR2K
NRBF2		CNPY2						DLC1		C9orf16
KLKB1		SF3B4						AZGP1		FNBP1L
LOC157273		GARS						IL13RA2		ADSL
C2		DLG1						FMO4		IGF2BP2
IDNK		HNRNPC						MPDZ		NOTCH3
NAMPT		INTS8						SLC39A14		CD58
PDE2A		PDSS1						CYP2J2		DDAH2
CBS		KIAA1429						ALDH1L1		IGSF3
PPM1K		HEATR1						PZP		SPAG5
PCOLCE		GBAP1///GBA						CYP4F2		PSMD10
DHRS4L2///DHRS4		TMEM206						SLC1A1		PLOD3
ADH6		FNBP4						ALDH1B1		RBM3
GIPC2		LOC100130872///SPON2						ACSL5		P2RX5-TAX1BP3///TAX1BP3
IVD		BARD1						PGM1		MRPL13
PTS		SCARNA15						F12		ATP2A2
FGF14-AS2		EIF3H						DMD		RAD51AP1
MIR7110///PDIA5		EBF1						CPT2		CENPM
CD5L		STAMBPL1						AVPI1		CARM1
GPR146		EFNA4						LAP3		ELF3
LMAN1		MIR1292///SNORD110///SNORD86///SNORD57///NOP56						C1QTNF1		TES
MYO10		NFYA						SERPINA10		ACACA
C3P1		SERF1B///SERF1A						GBP1		ADAM9
KCND3		CHD1L						LECT2		E2F3
ST3GAL6		FRG1BP						AKR7A3		ANXA2P2
GALC		FAM122B						SLC27A2		COL15A1
MAOA		DCAF13						PLG		SRP72
LINC01554		MAP1B						HP		GARS
MASP2		PHOSPHO2-KLHL23///KLHL23						AIM1		AKR1B10
TPD52L1		ONECUT2						GADD45B		TBC1D16
S100A8		CENPK						PCK1		BSG
SKAP1		ATRX						LIPG		GNPDA1
GLS2		ZNF532						PLG///LPA		TRIP13
SLC6A16		DNAH14						CPN2		NT5DC2
EVA1A		H2AFX						CYP4F2///CYP4F3		SMURF2
C4orf19		TOMM40L						PINK1		PPP3CB
SLC25A25		MCM4						SMAD6		GMFB
RHOB		PTGFRN						SLC25A15		TWF1
SIGIRR		FIGNL1						CES2		GATAD1
CTSB		FOXK2						SHBG		ASNA1
SLC22A7		BLOC1S3						PRG4		TMEM251
LOC101927157///NIPAL1		UBAP2						DAO		CAPRIN1
NEU4		KDM5B						ABHD2		EEF1E1
HBG2///HBG1		SBNO1						TTR		LPCAT1
CFL2		DGKH						TMEM45A		ARMC1
PLG///LPA		STAT1						NAAA		NRAS
PNP		NAA40						ABCB11		LRP10
HS3ST3B1		EHMT2						SUOX		USP1
C8B		INPP5F						LY75-CD302///CD302///LY75		MIR6758///MARS
AZGP1		RRS1						SDS		MIR7112///BOP1
DCTD		DVL3						ABCA6		ATAD2
ASS1		C1orf131						IGHA2///IGHA1///IGH		PBK
RIDA		PBK						RUNDC3B		TP53I3
ALKBH7		OAS3						PDGFRA		GOLPH3L
LOC100505985		SGO2						MAOA		AZIN1
GYG2		C8orf76						NR4A2		COL5A2
SCN9A		RPS24						PTGIS		LOC101927705///P4HA2
ACAA2		TULP3						TRIB1		FBL
CXCR2		DNMT3A						FMO2		GTPBP4
PHLDA1		CENPL						PAPSS2		PLEKHA1
LOC100287413///GLYATL1		TGFBR1						PIPOX		MCAM
CITED2		FTX						GLDC		MRPL42
CCL3L3///CCL3L1///CCL3		LOC101928274///VSIG10						GLUD1		LSM2
RNF144B		UHRF1						RNF125		DONSON
LRG1		MSI2						SLC38A2		TFRC
FAM101B		TMPO						SERPINF2		SERPINI1
FXYD1		C8orf59						UPB1		LOC100130872///SPON2
NDFIP2		SAMD9L						CCDC69		SOX9
SHBG		LBR						ENPP1		ATR
C21orf91		ZNF7						HSD17B6		ENPP2
PLG		ATP6V1H						BBOX1		MIR664B///SNORA56///DKC1
HBB		ZC3HAV1						C4BPA		PUS7
B3GNT2		HOXA3						ANO1		ARHGEF2
PGLYRP2		MPP7						TKFC		COL4A2
EPAS1		COL4A2						EDNRB		GNL3L
MCEE		DLG5						PTPRC		CCNE2
PLAC8		LSM11						SNORD10///SNORA48///SNORA67///EIF4A1		UBR5
UGT2A2///UGT2A1		BBX						CYP2B7P		DBN1
DPT		LOC102724017						SLC47A1		MIF
BHLHE40		ZNF286B///ZNF286A						DUSP10		LOC100272216
ACAT1		SUV39H2						SORD		IRAK1
ABHD5		PCGF5						ENO3		PODXL
PRODH2		EFCAB2						CD81		SLC1A4
RBP5		SACS						SATB1		MARCKSL1
CDC37L1		GPR158						ALDH5A1		ITGB3BP
APOA4		NSMAF						MTTP		CDC25B
SAT2		MED12						CPS1		GPX7
QDPR		TRMT13						UGT2B28		RBCK1
CBLN3		WFS1						SULT2A1		DNAJC6
FNDC4		XPO5						TPD52L1		BCAM
MAT1A		AGO2						HYAL1		SPP1
CYP2B7P///CYP2B6		UBE2S						CA2		FAIM
SLC22A1		RPL32P3						GPLD1		G6PD
LIPC		ZNF226						PRODH2		CANX
CYP4F2///CYP4F3		GOLM1						C19orf66		P2RX5-TAX1BP3///TAX1BP3///P2RX5
SLC43A3		PHF20L1						BCHE		NME1
GCH1		STIP1						GLRX		IGF2BP3
FBP1		GPATCH2						ASGR2		SRM
NPC1L1		JADE2						ABHD14A-ACY1///ACY1		ATP6V1C1
PLEK2		ATF6						FMO3		KDELR3
ACADL		EDIL3						ADI1		SGCE
FHL1		METTL3						HPR///HP		FGFR4
GCDH		PTK2						PLIN1		GYG1
F2		DNAJC9						PSD3		PLP2
C6		TSEN15						AGXT		TPM4
VSIG4		LAMP3						SLC17A3		MIR1304///SNORD5///SNORA32///SNORA40///SNORA18///SNORA1///SNORA8///TAF1D
FNIP2		COL8A1						COLEC11		RRAGD
SRPX		MSH2						SLC4A4		BUB3
UQCR10		CCNB2						FAH		MYRF
STARD5		GON4L						SDHB		HOMER1
PTPRS		HMGB2						CPN1		MYO6
DEPDC7		LOC389834						HAL		GMCL1
TGFA		TTK						ETNK2		SLC38A1
LOC101927752		CBFA2T2						FAXDC2		VIL1
TMEM45A		CASK						RAB17		MAPK13
MPPED1		SPDL1						IGFBP4		SFN
PPP1R3B		FANCI						NSUN6		IVNS1ABP
IGSF9		METTL18						FOXO1		BAG2
SUCLG2		LOC727820						PDK4		ATM
C11orf71		COL1A2						RAB26		H2AFY2
C14orf105		KIF4A						APOL1		PON2
HBD		GLUL						FGB		TUBA4A
ARSD		FAM49B						SLC2A2		IMPDH2
ATF3		WDYHV1						SLC22A7		MTDH
AGTR1		C6orf136						ACOX2		SLC6A10PB///SLC6A10P///SLC6A8
RMDN2		RFX3						ITIH1		MARCKS
TMPRSS6		CCDC86						OTC		PLEKHF2
ERLIN1		ISG15						KLF12		LAMB1
TACSTD2		TAP1						GK		SLC6A8
SOCS2		LRP11						PDGFC		BICC1
ETS2		ST8SIA6-AS1						ZBTB20		MMD
AXL		FAM60A						F7		SMC3
FCGR3B		LMNA						SELENBP1		CDKN2C
HPX		CPD						PPFIBP1		TUBB2A
PLD1		TMEM245						ID2		NQO1
EXPH5		SMAD5						SLC39A8		RGS5
GLYCTK		MANEAL						PPP1R1A		NAV3
OLFML3		STRN						LEPROT///LEPR		ELOVL2
CLIC4		LOC153684						LIME1		HEY1
ANXA3		CDC7						PLA2G16		CA12
LDOC1L		MAF1						MXRA5		EPCAM
SLCO1B3		LOC100499489						FGA		ATP1A1
MAGEH1		PLAG1						ZFAND5		SSR1
CYP4A11		PDGFA						TFR2		TXNRD1
DMGDH		PPAT						HGF		ASPH
CTSLP8		TGS1						FETUB		CEBPG
FAXDC2		PCNA						CBS		MTR
UROC1		CDC20						CDO1		FAT1
CNTN4		ARHGEF3						APCS		SLC7A11
SLC6A13		MND1						ADCY1		SNORA11E///SNORA11D///MAGED4///MAGED4B
ABHD2		MIS18BP1						G0S2		PIEZO2
CYP2J2		UHMK1						CYP27A1		MIR1908///FADS1
NPHP3-ACAD11///ACAD11///NPHP3		UBN2						UGP2		BTBD3
PPID		TOR1AIP2						SERPINC1		TM4SF1
RCL1		AACS						ABLIM3		PHLDA2
PRG4		LOC100506123///LOC100506076						BHMT2		LIMK2
MBNL2		DOCK9						ID2B///ID2		CENPE
DAB1		ANKS6						LOC101930322///ABCC6		KRT23
CYP2C9		PIGU						CYP3A7-CYP3A51P		GNB1
TKFC		CENPJ						CYP4F3		COL1A2
ZFP1		STIL						CP		TOX3
C1R		NCOA2						ANGPTL3		SQSTM1
HMGN5		RAD51AP1						DPYS		MKKS
SEMA5A		ZNF302						AGMAT		GSTA4
LOC100996506///RETSAT		LOC101928195///LOC100996643///MTHFD1L						LY6E		STK39
ACVR1C		PLPPR1						IFITM1		TTC39A
PPARA		IRAK1						ALDH4A1		TGFB1
SLC16A10		HEXA						IGLV1-44		RBBP8
ADGRG6		SCRIB						A2M		NEB
PSAT1		ASAP2						CAPN3		TMEM97
HGFAC		RBM24						LIPC		XPOT
HCAR3		DCTN5						UGT2B15		TCEAL9
SLC16A2		GJC1						NAMPT		ITGAV
ACMSD		DSCC1						DDTL///DDT		APOBEC3B
TAB2		MAP4K4						FBLN5		SLC39A4
CYP4F2		HSP90AB1						PSAT1		GAL3ST1
NR4A2		FANCG						TF		AFP
CD83		TAF1A						LOC100507472///PCSK6		STAT1
MMRN1		VCPIP1						IGKC		MIR452///MIR224///GABRE
DNAJC12		SOX9-AS1						TSC22D3		SCD
PLGLB1///PLGLB2		ZFAS1						MAFB		TESC
N4BP2L1		DLAT						ASGR1		S100A10
IGF1		GSTA4						C1QTNF3-AMACR///AMACR		TKT
C9orf72		ANXA2						ADIRF		THSD7A
C4orf3		TOP1MT						ACOX1		LGALS3
CR1		SOCS7						ORM2///ORM1		DHCR7
NECTIN3		TKT						ITPR2		DSG2
GRAMD1C		TRIM16						SULT1E1		COL1A1
GRHPR		LOC286052						PNPLA3		SRI
ST6GAL1		NPNT						LOC100653057///CES1		TMED3
TRPM8		MTERF3						HRG		COCH
MS4A6A		IRS1						IGK///IGKC		PLPP2
CCL4		CEP152						PHLDA1		ATP1B3
NRG1		MDM4						AADAC		HIST1H2BJ///HIST1H2BG
DYX1C1-CCPG1///CCPG1		ITGA2						HMGCS2		NEDD9
ANPEP		MCM3						ABCB4		SPARC
ANGPTL3		GLMP						BDH1		ASNS
LINC00238		FNTB						MYO10		VCAN
SLC39A8		LGALS3BP						ALB		MEP1A
RNASE4		SQSTM1						PCYOX1		TFPI
AZGP1P1		LOC100134445						APOC3		APOLD1
HAND2-AS1		MCM8						AKR1C4		LCN2
CHST7		VPS13C						ARG1		FASN
CD14		LPCAT1						SRGN		CAV1
KLHL15		RPL22L1						CCL19		CLGN
ZCCHC24		MICAL1						EIF5A		S100A6
LY75-CD302///CD302///LY75		CADM1						CPS1-IT1		CDKN2A
SMAD6		TERF1						AUTS2		MRPS12
ZNF667-AS1		EXOSC4						SERPINA7		TNFRSF21
CFI		NEK3						ORM1		COL2A1
CLDN1		SOX9						ANK3		S100A11
PROK2		MSTO1						ATF3		FMO1
SLCO1A2		CCT5						GLUD2		SSUH2
ECHDC2		IFI44						CYAT1///IGLV1-44///IGLC1		CCNE1
CCR1		RBM41						LOC101929829///CYP2D6///CYP2D7		MMP9
SGPP1		PTPN14						APOA1		STEAP1
TSPAN7		KNL1						F2		LOC101929219///LOC100505650///C1orf186
GYS2		RPS6KA3						RBP1		HIC2
FABP1		TPX2						PPARGC1A		AGR2
NNMT		NUP155						MIR612///NEAT1		GOLM1
P2RY12		BUB1						IGLC1		LYZ
SLC1A1		ZC3H3						SAA2///SAA1		PDZK1IP1
KCNJ15		EIF3E						INSIG1		NREP
TRPM7		BSG						HPGD		THBS4
ACADM		TMEM98						UGT1A3///UGT1A1///UGT1A4///UGT1A9///UGT1A5///UGT1A6///UGT1A7///UGT1A8///UGT1A10		ACKR3
CP		DYRK2						CFHR5		SOBP
TMEM220		ADA						MOCOS		NCF2
PECR		KIF11						SIK1		DLK1
SLC35A3		ANKRD36B						MIR8071-2///MIR8071-1///IGHV4-31///IGHM///IGHG2///IGHG1		MLLT11
FTCD		DIAPH3						CFB		PCOLCE2
LOC101928433		NME1						GSTA1		DUSP9
ABHD15		RRM2B						RARRES3		ZNF83
GPHN		RGCC						FABP1		SERPINE2
AGPAT2		HMGCS1						IL1RN		GDF15
GPT		ASPH						ABCG5		DKK1
DSE		LAMA4						IGFBP1		FGF21
ACOX2		TDRKH						G6PC		TPD52
ZBED1		NUF2						UGT1A1///UGT1A4///UGT1A9///UGT1A6///UGT1A8///UGT1A10		MUC13
GREM2		SNORD87///SNHG6						AGTR1		MMP12
ADIRF		TNFSF4						KYNU		MYH4
CYP2C18		SQLE						NQO2		S100P
AMN		DENND1B						CFH		UCHL1
F8		WDR4						SERPINA3
MLYCD		NCAPD2						PLA1A
PLGLB2		PHYHIPL						CCL16
SMARCA2		LOC101930583///GOLGA8B///GOLGA8A						GREM2
MUT		TAF15						NAT8B///NAT8
TDO2		PARPBP						KNG1
PALM2		RCAN3						ECHDC3
AMDHD1		HMGA1						LUM
SLC27A5		SLC1A3						F13B
FGD4		MYO5A						CFHR2
BLOC1S1-RDH5///RDH5		LCN2						ATP6V0E2
CYP8B1		FANCD2						GSTM1
EXOSC7///CLEC3B		SLC35F6///CENPA						ADGRG6
OBSL1		MATR3						HSD17B2
KLF7		FGF13						EFHD1
CYP2A7		FEN1						SLC6A1
SAA2-SAA4///SAA4		POLA1						ATF5
RNF125		EHD4						GSTM2
SRD5A1		MPPED2
PON3		HCP5
HEY2		SEMA3G
DNMT3L		SLC52A2
LRRC28		CDCA3
CLYBL		RB1CC1
CYP2A6		C8orf33
SLAIN1		NSMCE2
GCKR		E2F8
PER2		STXBP6
MRC1		RRAGD
SLC4A4		CENPE
LRRK2		ERV3-2
DSEL		SOWAHA
CYP2B7P		LRRC69
TMEM56		CSE1L
C11orf54		ANGPT1
FAM9B		C11orf80
FAH		SOS1-IT1
ALDH8A1		C5orf34
KDM6B		ANXA2P2
EPB41L5		KIAA0196
TMEM37		NCOA3
ITGA9		RGS5
CCL2		PECAM1
KLF4		IFI6
CD300A		SNORA17B///SNORA17A///SNHG7
AGXT		GSN
ISM1		SPINK1
CHST4		PEX6
LOC100507472///PCSK6		PDZK1
CPN2		TAP2
SERPINA10		PALLD
PIK3C2G		ALDOA
BDH1		FBXO32
PON1		SLC38A9
FCGR2B		TK1
ABCG8		MKI67
IGFBP4		KIF2A
ART4		CNIH4
CD1D		CBX3
LDHD		VARS
SEMA6D		MOSPD1
PDGFC		ACER3
SMIM19		CHML
CSF3R		CKAP4
SCARNA17		SFN
PPL		IGF2BP3
PROZ		COL1A1
NPR3		PLXNC1
HADH		LOC100272216
TGFBR3		LINC01355
SMIM14		RMI2
CAPN3		CTPS2
STX11		LOC101928000
OSBPL6		SIPA1L2
TUSC1		PDK1
MME		HN1
ASCL1		WWC3
KCNK5		NKTR
SLC37A4		C12orf75
NR0B2		BORA
PCK1		OLFML2B
HABP2		DCDC2
BASP1		SLC7A11
EPHA2		BLM
KLRF1		ILF2
DCN		ORC6
LINC01127		HOMER1
IL1RL1		UBR5-AS1
COLEC11		GOLGA8A
FYN		TPM2
LOC100507258///CA13		LTBP2
LDB2		KLHL23
GFRA1		NAV1
RGS7		TP53I3
GLYAT		TIGD7
SEC14L4		MYEF2
PLIN1		CEP41
G0S2		LOC101927705///P4HA2
IDO2		NDRG1
MCL1		OAS1
CDH1		MIR3658///UCK2
PLIN2		DEPDC1
C9		SMPX
MAF		VSIG10L
ITIH4		CD109
LINC01146		CCL20
PLAUR		BLVRA
TIGD2		PSPH
F9		CDK6
MROH2A		FAM13C
TTR		MOB3B
COBLL1		CCDC102B
DNALI1		FOXM1
MIR6883///PER1		MUC13
LINC00844		H2AFY2
ABCD3		PTPRG
MGLL		CXCL10
C1orf162		PARD3B
BCL2L10		TRIP13
HOGA1		MARCKS
GGT5		ABCC4
HMOX1		SOX4
ADSSL1		TNFSF15
ADI1		COL5A2
TLN2		KIF2C
CH25H		LINC00597
DAO		FAM3B
EP300-AS1		SLCO2A1
SERPINA4		GRAMD1A
C11orf96		RTN1
SLC17A3		NEU1
SULT1A1		PLCB1
DNAJC22		SLAMF8
RAB20		DTYMK
ASL		LIMK2
CSAD		SLC51B
RTP3		PLA2G4C
SRPRA		ATP1B3
SEPSECS		CCL18
RAMP3		OAS2
CNGA1		LOC102723694
SLC46A3		LOC100509445///LOC728715///OVOS///OVOS2
RAPH1		SPP1
CDH19		NQO1
MS4A7		IRX3
SAMD12		LOC101930578///MRPS31P5///THSD1
AKR7A3		ARHGEF28
SULT1A2		GNAL
UPB1		RNF157
ANKRD35		SLC40A1
CD163		SULT1C2
AKR1D1		HRCT1
DHRS1		IGSF3
ANK3		MCM5
ABHD14A-ACY1///ACY1		HLA-F
SIK1		FRMD3
NFKBIZ		ZNF165
RDH12		MCM7
KMO		PIR
KCNMA1		TRIM71
SREBF1		PTPRH
TEK		CA12
TFR2		MCM2
GRB14		GREB1
MST1		RARRES1
ABCA8		CDC6
SAMD5		CEP55
ABCG2		MORF4L2
PDK4		ZSWIM5
C7		PEG10
LOC102724880		CLIP4
MPDZ		DEPDC1B
SLC16A4		MTFR2
ECM2		CELF6
PALM3		LRPAP1
MMAA		MX1
LOC101927144///ACYP2		DAB2
SCG5		HJURP
CPN1		OSGIN1
GADD45G		CDC25C
RAB17		NCAPH
C1S		SYNJ2
RBMS3		HIST1H2BJ///HIST1H2BG
ANGPTL1		RAB3B
PIPOX		NOTCH3
CISH		SGK223
HPGD		TMEM64
ASPN		TEAD2
CYP3A4		FZD6
TAT		NUDCD1
CDHR2		VASH2
SLC6A12		TRIM31
CCDC71L		NRXN3
ADRB1		CCL15-CCL14///CCL15
LOC101928916///NNMT		GINS2
CDHR5		TRIM69
PDE11A		TUFT1
SYTL5		HSD17B3
LARP6		MRAP2
INMT		C1orf112
HMGCS2		GPD1L
GLUD2		SHCBP1
CYP4F3		GLYR1///SEPT6
GPR180		ZNF738
SMIM24		CKAP2L
TPST1		OIP5
RAPGEF4		6-Sep
FLRT3		BAMBI
HIPK3		HOXA13
INS-IGF2///IGF2		CHST11
FAM110C		TTLL4
CX3CR1		FZD7
ABCA6		GRK3
NAP1L5		INO80D
IL6ST		SIX1
DCXR		F13A1
ADORA3		NFAT5
FAM229B		SSUH2
SLC39A5		CD52
IL1RN		SMOC2
KDM4C		BICC1
MICU3		TESC
SLC44A1		MIR6845///NRBP2
ACSM5
LOC102723845
RAB27A
TLR3
SOX6
PROM1
UNC93A
PGRMC1
SULT1E1
CCDC3
SORD
APBA1
FCGR2C
SDS
ENPEP
ADH1B
GRIA3
APOB
HAO1
IL13RA1
LIPG
DUSP10
CYP4A22///CYP4A11
SLC10A1
GJB2
LOC100507389
HSD17B6
ACSM2B///ACSM2A
WFDC1
KNG1
ALDH1B1
GPER1
TMEM47
ALDOC
G6PC
LOC101929829///CYP2D6///CYP2D7
PLPP5
VNN3
FETUB
